# Supplementary material for: Tuning the radial structure of core–shell silicon carbide nanowires
Source: Royal Society of Chemistry journal article supplement (doi:10.1039/c4ce01381f), 2014-11-21
Supplement: c4ce01381f1.pdf [file c4ce01381f1.pdf]

**Electronic Supplementary Information**

**Tuning the radial structure of core-shell silicon carbide nanowires**

*Marco Negri<sup>1,2</sup>, Sathish Chander Dhanabalan<sup>1</sup>, Giovanni Attolini<sup>1</sup>, Francesca Rossi<sup>1</sup>, Marco Campanini<sup>1,2</sup>, Filippo Fabbri<sup>1</sup>, Giancarlo Salviati<sup>1</sup>*

*<sup>1</sup>IMEM-CNR, Parco Area delle Scienze 37A, 43124 Parma (Italy)*

*<sup>2</sup>University of Parma, via Università 12 - 43121 Parma (Italy)*

**Experimental details**

Real silicon surfaces can present additional ceramic, metallic or organic contaminations, RCA cleaning procedure is suggested in order to remove them<sup>1</sup>. To remove organic contaminants which are insoluble in polar solvents, a 5:1:1 H<sub>2</sub>O:H<sub>2</sub>O<sub>2</sub>:NH<sub>4</sub>OH solution is used to dip the silicon substrate for 20 minutes at 75° C. After a HF treatment the so-formed silicon oxide layer is removed. The following step is the removal of ionic and heavy metal atomic contaminants using a bath, kept at 75°C, of a solution of 6:1:1 H<sub>2</sub>O:H<sub>2</sub>O<sub>2</sub>:HCl for 10 minutes.

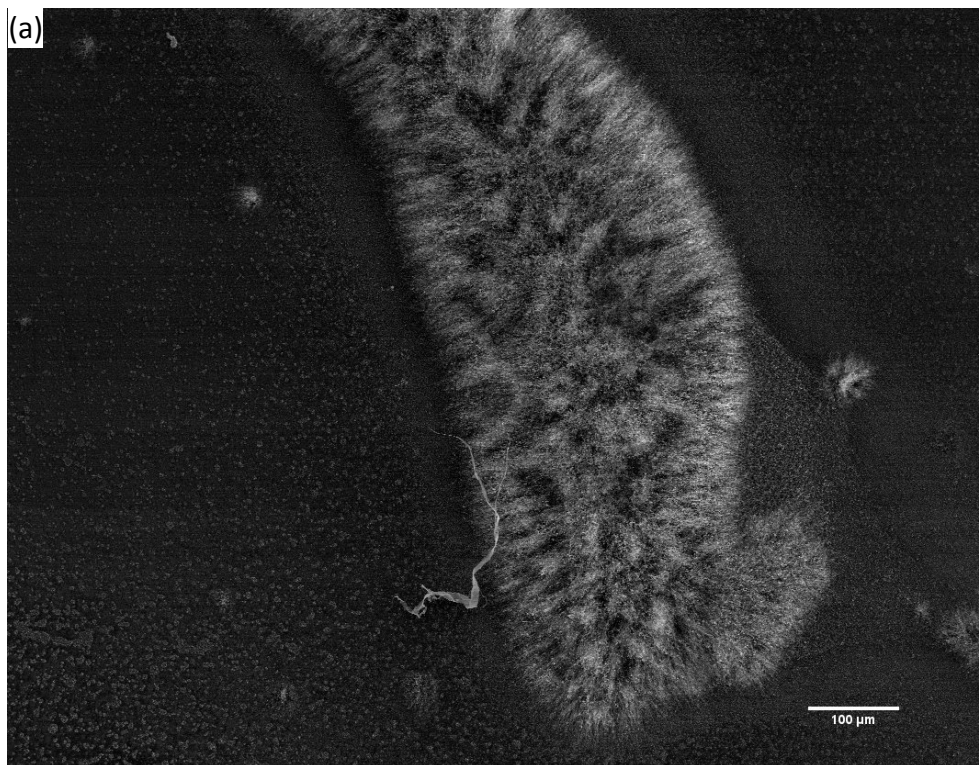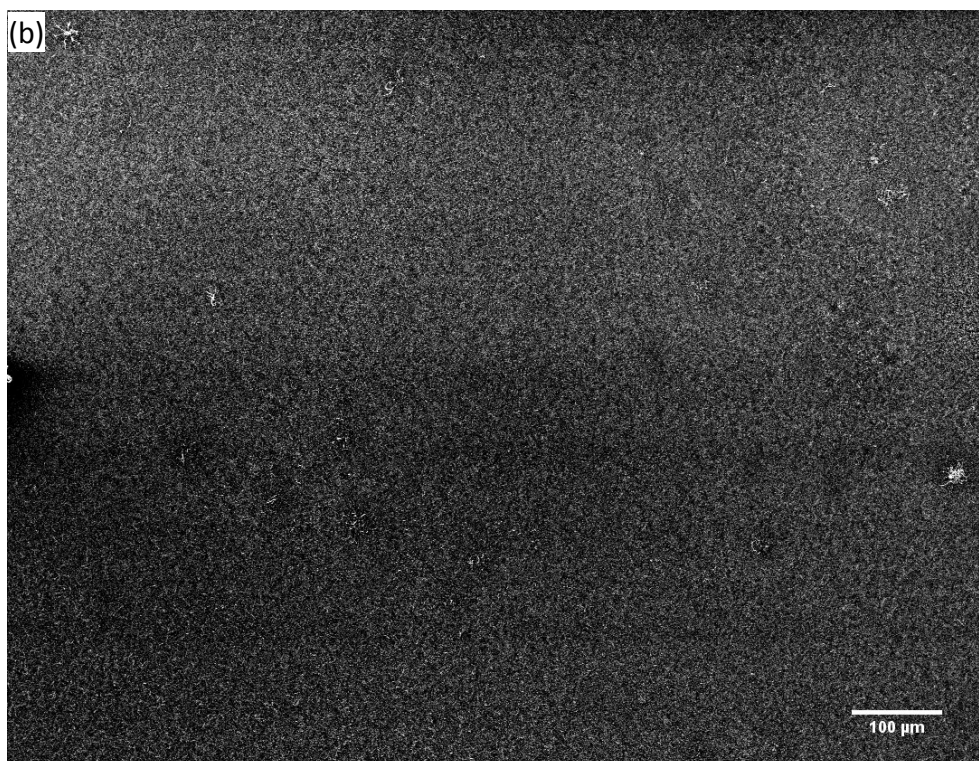

**Figure S1:** Secondary electrons SEM image of core-shell nanowires sample. It is possible to observe the growth of core-shell nanowires only in the area covered with catalyst. Sample in figure a) was prepared using a catalyst solution without surfactant: the catalyst coverage is non-uniform and the growth occurs only in the circular zone in the lower part of the image. Figure b) shows the result of a nanowires synthesis using a catalyst solution with surfactant: the uniform catalyst layer allow to obtain a homogeneous growth of core-shell nanowires on the entire substrate.

Fig. S2

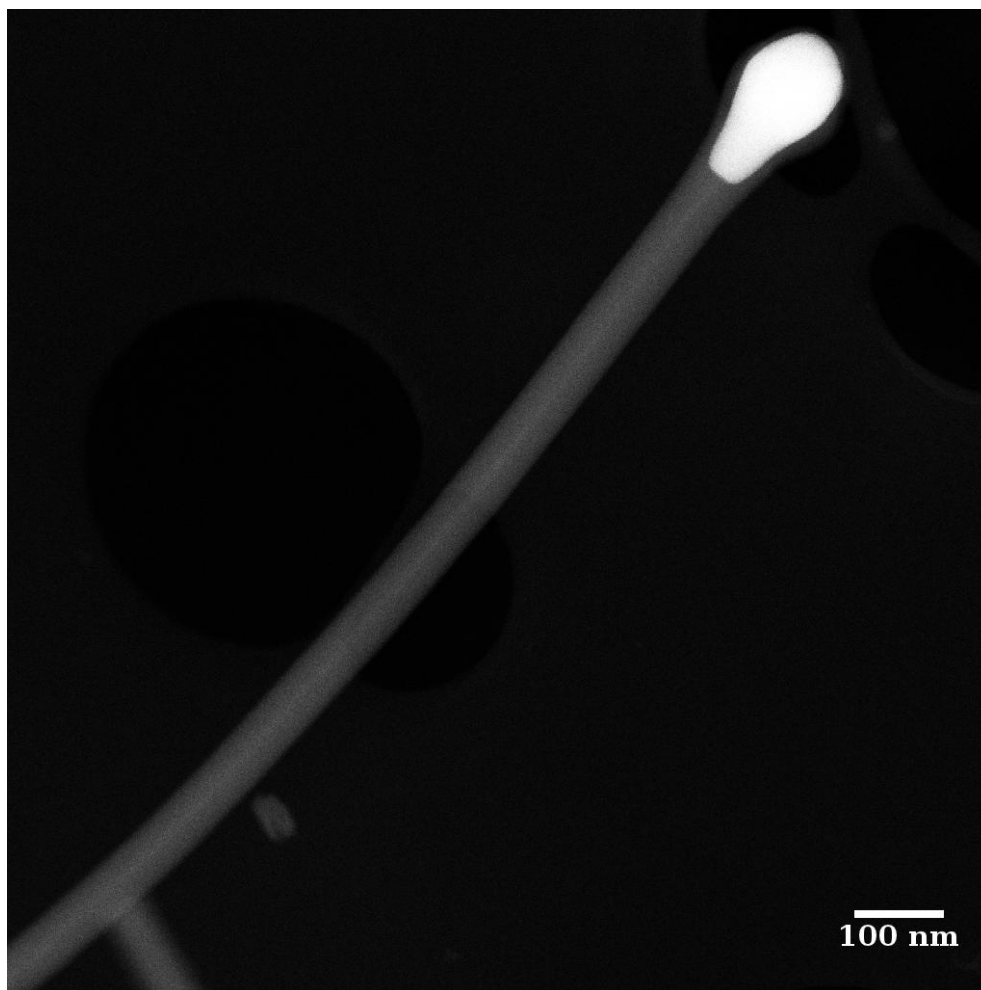

**Figure S2:** STEM HAADF (High-Angle Annular Dark-Field) image showing the distribution of high Z elements (brighter areas in the image). The presence of iron in the catalyst tip of the nanowires suggests a VLS type growth mechanism for these nanostructures.

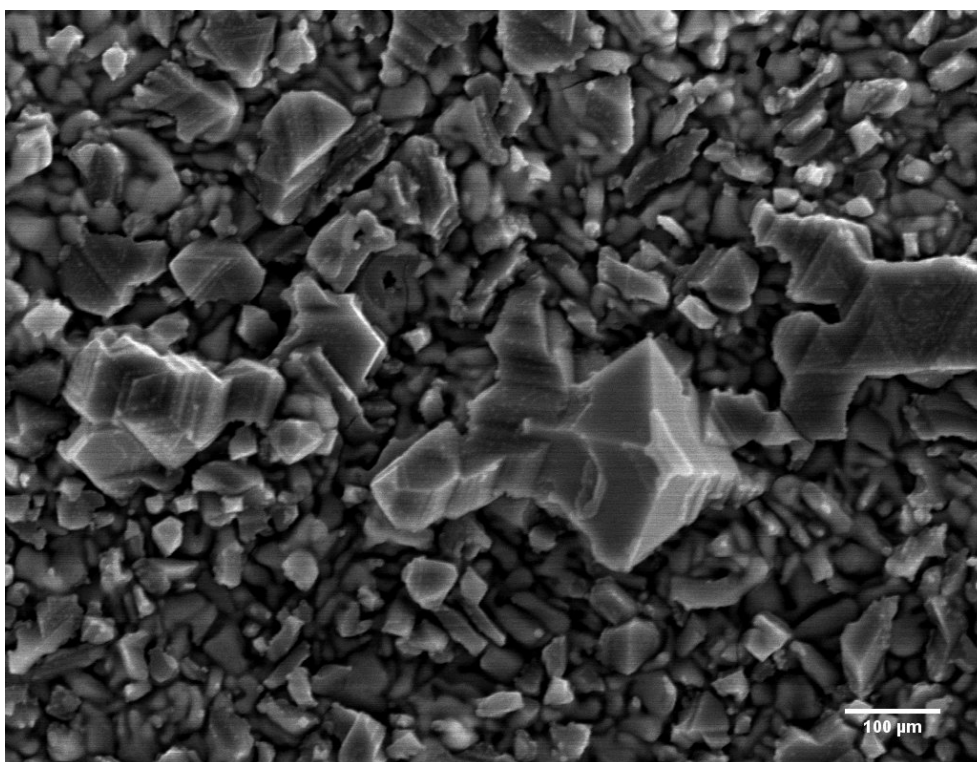

**Figure S3:** SEM image of the sample synthesized at 1050° C and prepared using  $\text{Fe}(\text{NO}_3)_3$  catalyst. The presence of geometric shapes indicating crystalline structures suggests the formation of the alloy between silicon and iron, but further investigations are needed.

## REFERENCES

1. Kern W & Puotinen D A., *RCA Rev.*, 1970, 187–206.
